# Supplementary material for: The weather of 1740, the coldest year in Central Europe in 600 years
Source: Copernicus journal article supplement (doi:10.5194/cp-2024-40), 2024-06-05
Supplement: Supplementary file 1 [file cp-2024-40-supplement.pdf]

1 **The weather of 1740, the coldest year in Central Europe in 600 years**

2 Stefan Brönnimann<sup>1,2,\*</sup>, Janusz Filipiak<sup>3</sup>, Siyu Chen<sup>1,2</sup>, and Lucas Pfister<sup>1,2</sup>

3 **Supplementary Figures**

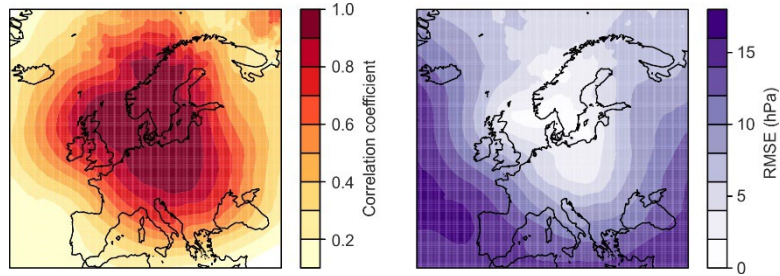

4  
5 **Fig. S1.** Cross-validation of analog sea-level pressure reconstruction within ERA5. The year 1940 was  
6 reconstructed based on the years 1941-2022 in ERA5. Left: Correlation coefficient, right: root mean squared  
7 error.

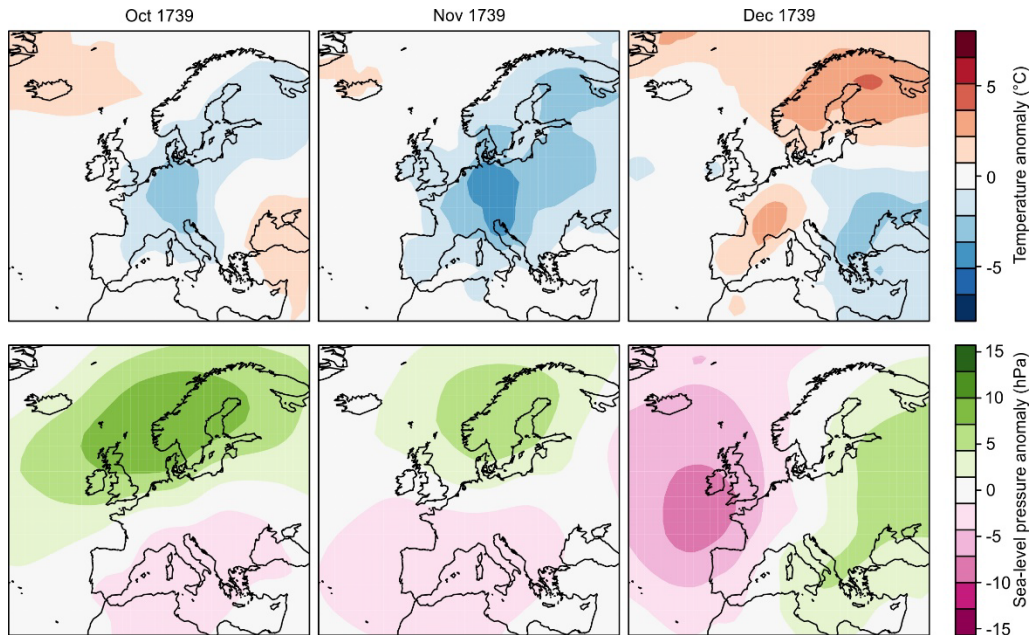

8  
9 **Fig. S2.** Monthly anomalies (with respect to 1710-1739) of (top) temperature and (bottom) sea-level pressure in  
10 Oct-Dec 1739 in the ModE-RA ensemble mean.

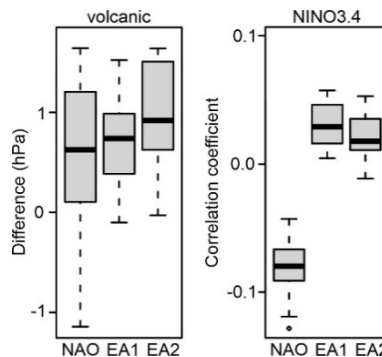

11  
12 **Fig. S3.** Left: Averaged NAO and EA indices in ModE-RA following volcanic eruptions in 1710-2000  
13 (expressed as anomalies from the average of all years). Right: Correlations between NINO3.4 (Sep-Feb) and  
14 indices of NAO (Jan-Feb) and EA1 and EA2 (Mar-May) in ModE-RA in 1710-2000. The box plots show the  
15 distribution of the ModE-RA members.
